# Supplementary material
Source: publisher figshare collection journal article supplement (https://rs.figshare.com/ndownloader/files/17350898)
Supplement: Supplementary file 1 [file 17350898]

**Supplementary materials**

**Western blot films**

Figure 5D







Figure 5E
